# Supplementary figures and images for: Clinical Assessment of Breast Volume: Can 3D Imaging Be the Gold Standard?
Source: PubMed Central journal article supplement — Plast Reconstr Surg Glob Open. 2020 Nov 25;8(11):e3236. doi: 10.1097/GOX.0000000000003236 (PMC7722547; doi:10.1097/gox.0000000000003236), 2020-11-25

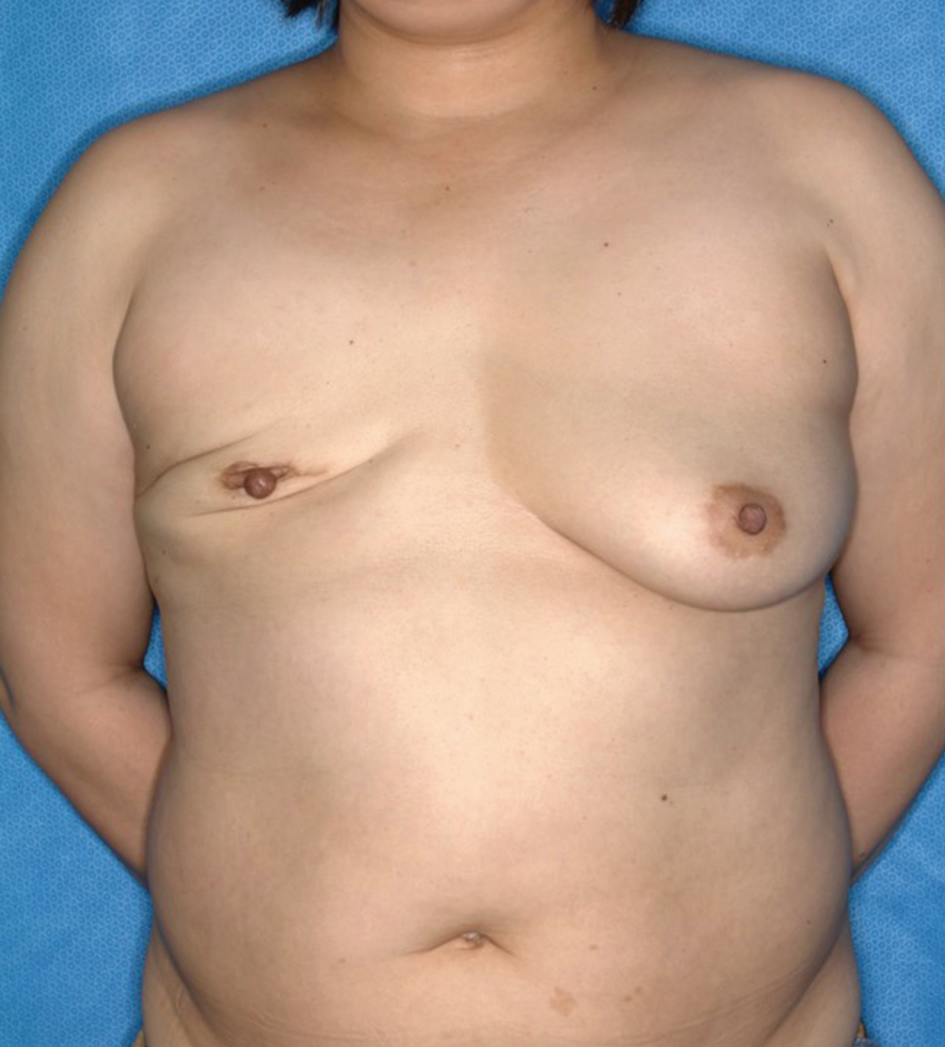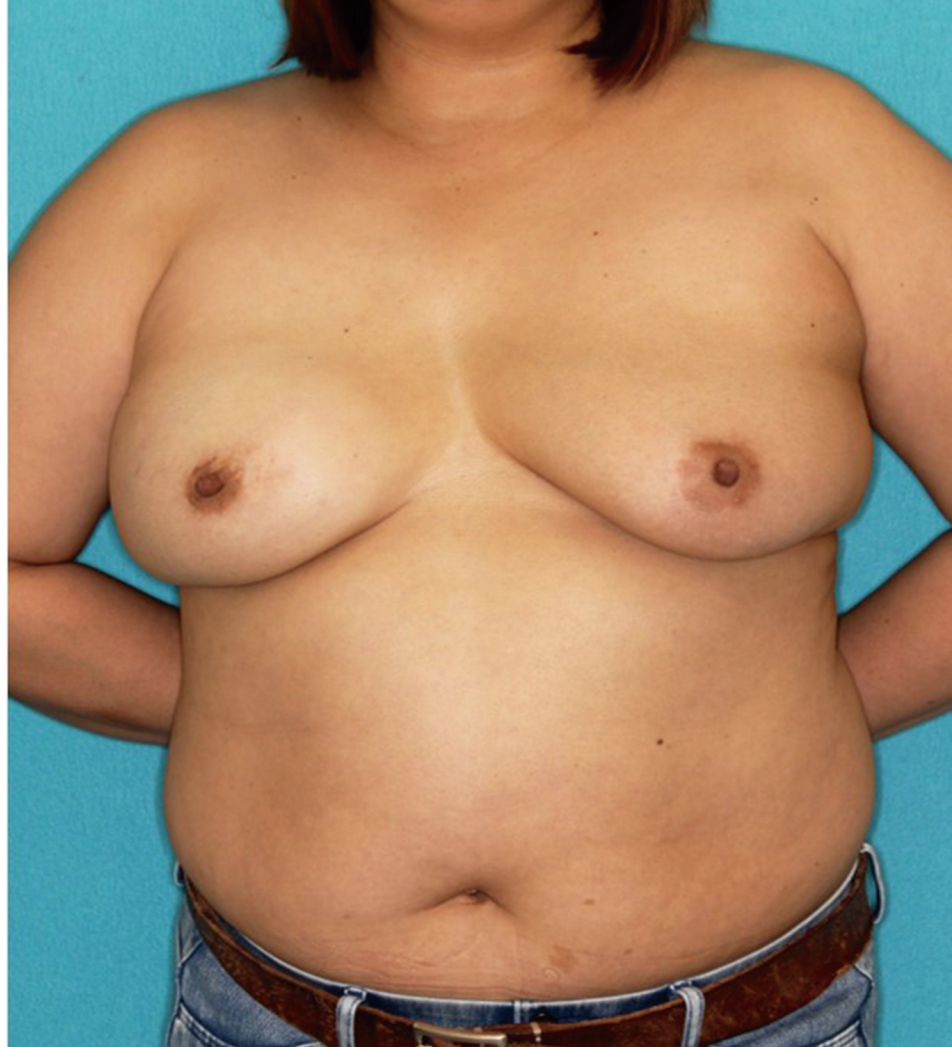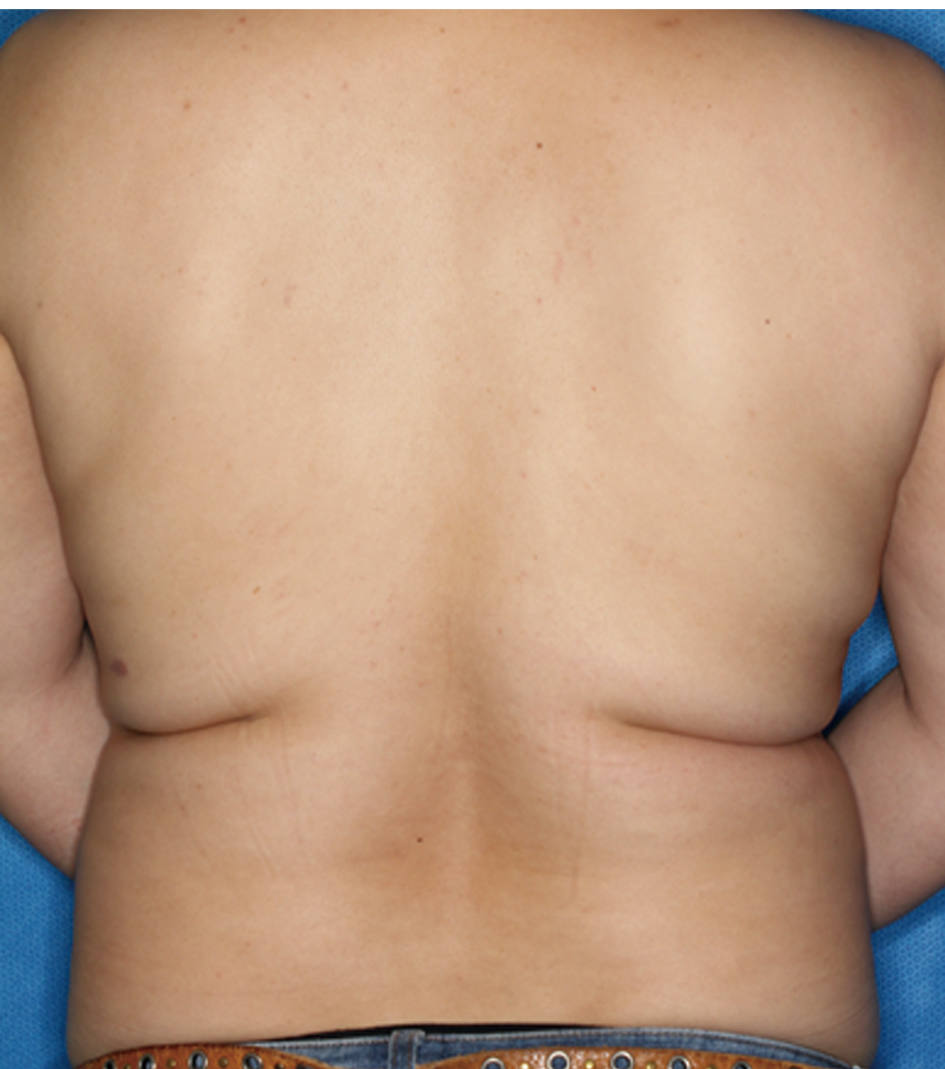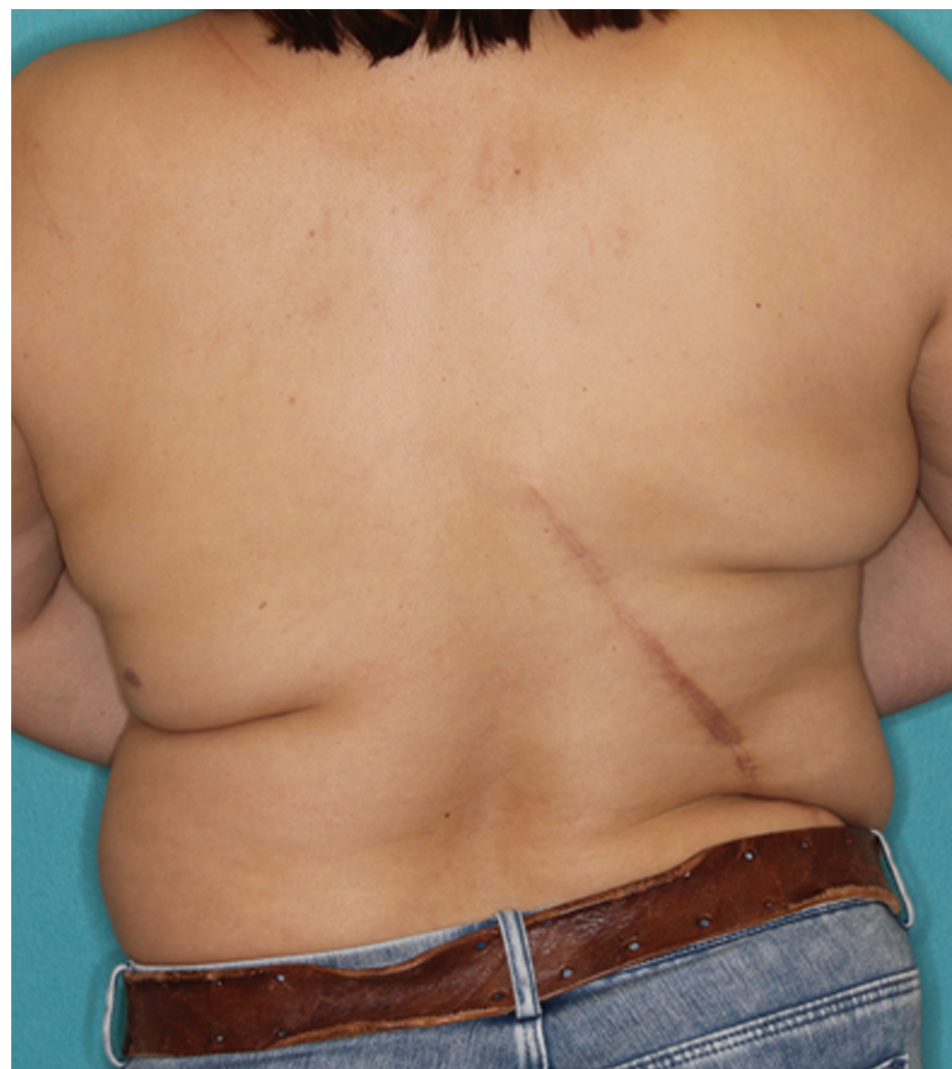

Supplement: gox-8-e3236-s001.pdf [file gox-8-e3236-s001.pdf]

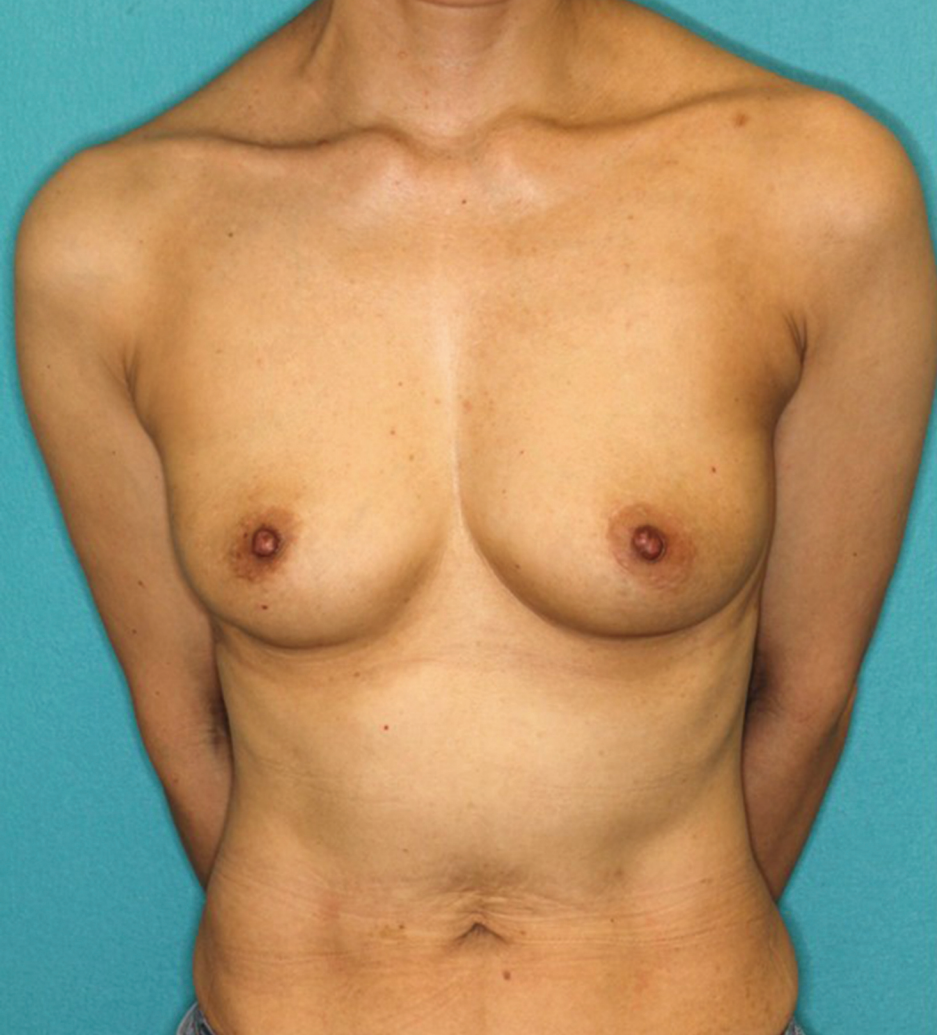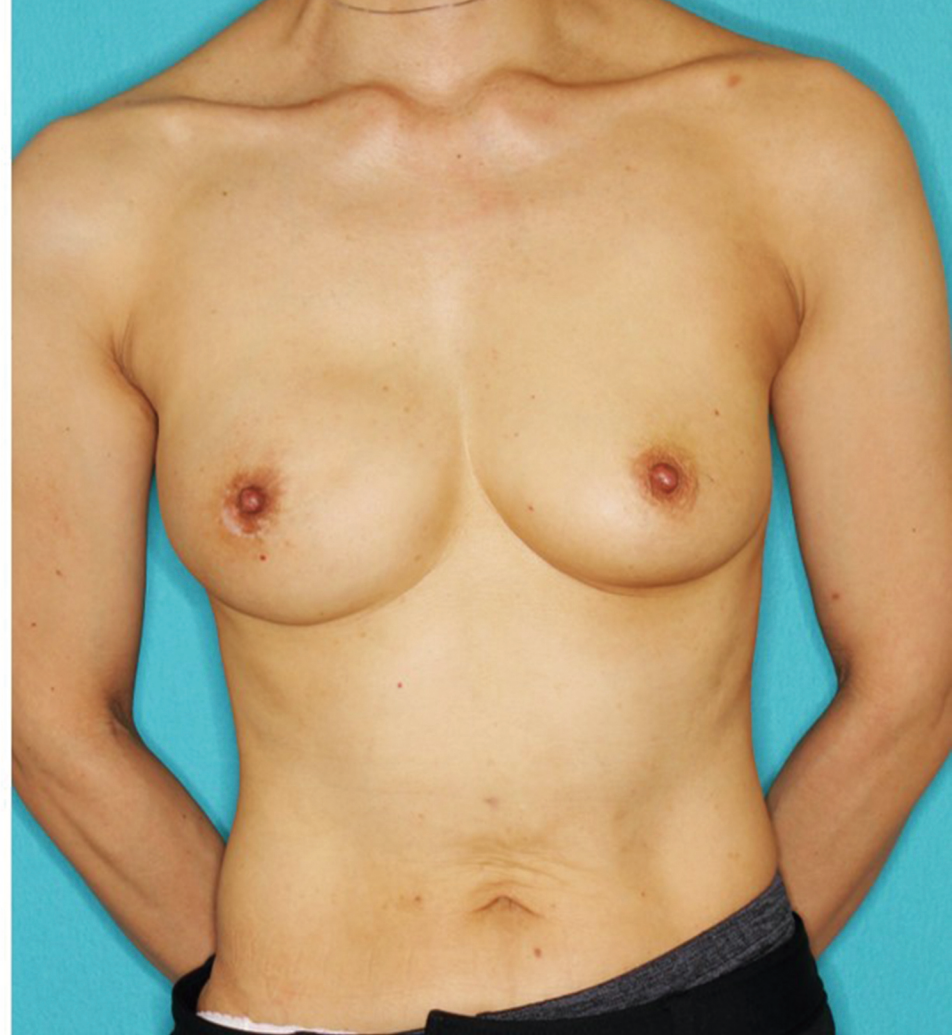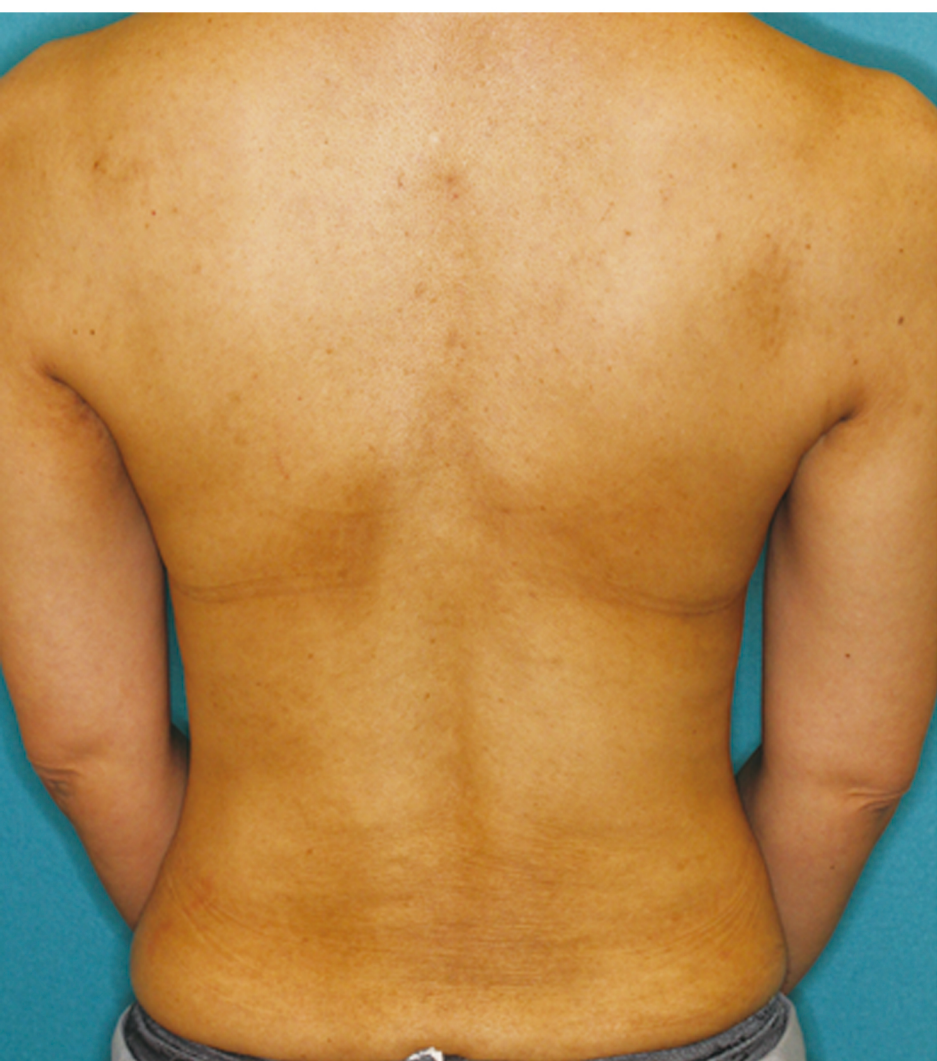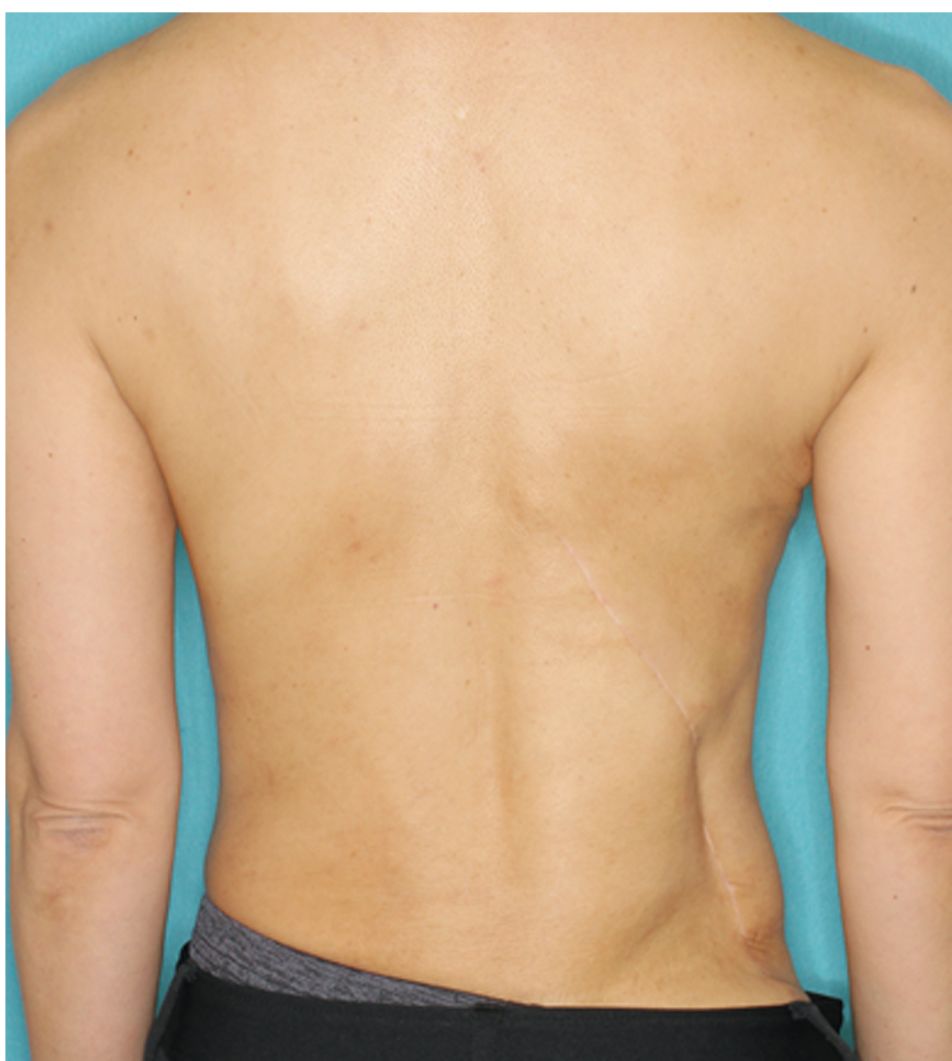

Supplement: gox-8-e3236-s002.pdf [file gox-8-e3236-s002.pdf]
